# Supplementary material
Source: PubMed Central journal article supplement (PMC2787095)
Supplement: NIHMS157576-supplement-supplementary_data.pdf [file NIHMS157576-supplement-supplementary_data.pdf]

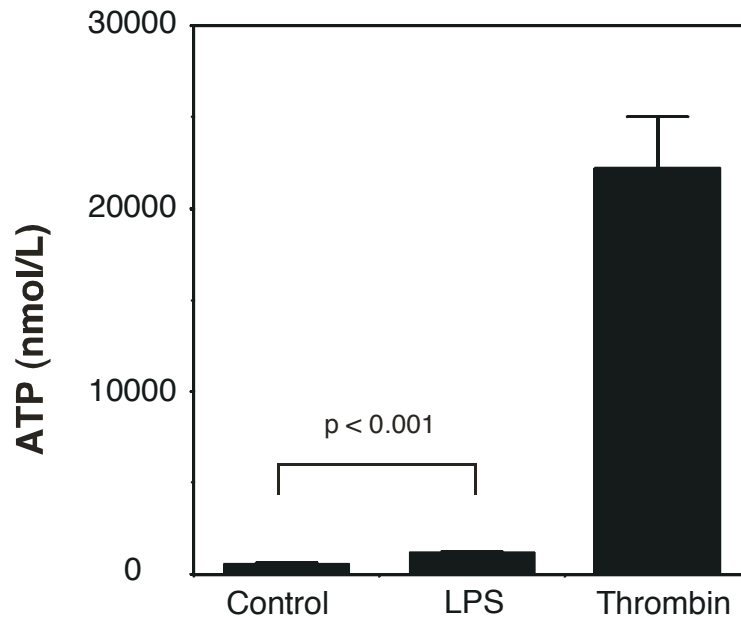

**Supplementary Figure 1.** LPS and thrombin induced ATP secretion from human platelets. Washed human platelets were incubated with 1  $\mu\text{g/ml}$  of LPS (0127:B8) or thrombin (0.025 U/ml) at 22  $^{\circ}\text{C}$  for 10 min. The release of ATP into the platelet supernatant was determined by luciferin/luciferase assay.

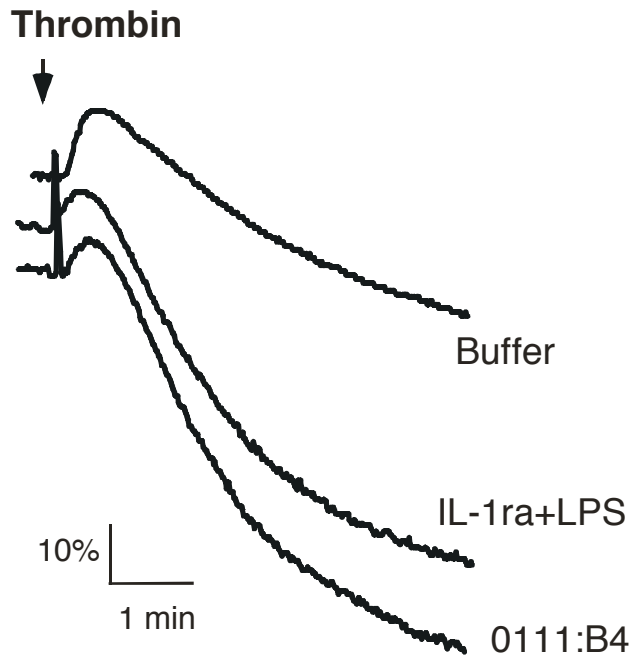

**Supplementary Figure 2.** LPS-potentiated platelet aggregation is not affected by an IL-1 antagonist. Washed human platelets were pre-incubated with a recombinant IL-1 antagonist IL-1ra (250 ng/ml) or buffer for 5 min at 37 °C, and then exposed to a low concentration of thrombin (0.018 U/ml) in the presence of LPS (0111:B4, 10 µg/ml) or buffer to induce platelet aggregation.
